# Cortisol Response to Corticotropin Stimulation in Trauma Patients

## Influence of Hemorrhagic Shock

Sophie Hoen, M.D.,\* Karim Asehnoune, M.D.,† Sylvie Brailly-Tabard, Ph.D.,‡ Jean-Xavier Mazoit, M.D., Ph.D.,§ Dan Benhamou, M.D.,|| Pierre Moine, M.D., Ph.D.,§ Alain R. Edouard, M.D., Ph.D.¶

**Background:** An abnormal adrenocortical function and a vasopressor dependency have been demonstrated during septic shock. Because trauma and hemorrhage are the leading causes of noninfectious inflammatory syndromes, the goal of this study was to assess the adrenal reserve of trauma patients and its relation with clinical course.

**Methods:** Cortisol response to an intravenous corticotropin bolus was obtained in 34 young trauma patients (Injury Severity Score =  $29.1 \pm 7.3$ ) at the end of the resuscitative period ("early phase") and at the end of the first posttraumatic week ("late phase"). Cortisol response less than +9 g/dl defined an impaired adrenal function, and the corresponding patient was called a nonresponder. According to the early response, hemorrhagic shock, circulating interleukin-6, need for vasopressor therapy, subsequent organ dysfunction and infection, and outcomes were studied.

**Results:** Sixteen patients (47%) were nonresponders at the end of the early phase. Hemorrhagic shock was more frequent (69 vs. 28%;  $P = 0.037$ ) and interleukin-6 concentrations were higher ( $728 \pm 589$  vs.  $311 \pm 466$  pg/ml;  $P = 0.048$ ) in these patients. The early cortisol responses were negatively correlated with the concomitant interleukin-6 serum concentrations ( $r^2 = 0.298$ ;  $P = 0.003$ ). Four early nonresponders (and shock patients) remained nonresponders during the late phase (25%). Morbidity and mortality were similar in early nonresponders and responders. The duration of norepinephrine treatment and the total amount of infused drug were significantly higher in early nonresponders.

**Conclusions:** A sustained impairment of adrenal reserve is frequently observed in trauma patients. This abnormal cortisol response to corticotropin stimulation is related with the inflammatory consequences of hemorrhagic shock and is followed by a prolonged vasopressor dependency.

THE stress response is a complex adaptive phenomenon that allows the integration of the defense mechanisms directed against external and internal stressors. This co-

ordinated response involves the nervous, endocrine, and immune systems.<sup>1</sup> Indeed, the immune system through the inflammatory mediators, especially cytokines, stimulates the release of corticotropin-releasing factor from hypothalamic neurons. This central activation of the hypothalamic-pituitary-adrenal (HPA) axis and the direct stimulation of adrenal glands by the sympathetic system may be a regulatory mechanism for preventing an excessive immune reaction. Major trauma is a leading cause of nonseptic inflammatory reaction through severe tissue injuries, hemorrhagic shock, and ischemia-reperfusion consequences. An uncontrolled inflammatory process may play a key role in the development of multiple organ dysfunction, resulting in an increase in posttraumatic delayed morbidity and mortality.<sup>2</sup>

As with septic patients,<sup>3,4</sup> abnormalities of adrenocortical function and vasopressor dependency have been occasionally reported in trauma patients.<sup>5-7</sup> A huge and sustained increase in interleukin-6 plasma concentrations is a characteristic feature of the trauma patients.<sup>8,9</sup> This cytokine represents a major determinant of the magnitude of HPA axis responses, especially cortisol secretion, to stressors.<sup>10-12</sup>

The goals of the current prospective and longitudinal study in severe trauma patients were therefore (1) to quantify adrenal reserve in relation with the injury severity, the hemodynamic status, and interleukin-6 early plasma concentrations, and (2) to evaluate the relation between an abnormal cortisol response to corticotropin stimulation, a possible vasodepressor dependency, and the clinical outcome of the patients.

## Materials and Methods

### Study Population

All consecutive trauma patients admitted in the surgical intensive care unit (ICU) between November 1, 2000, and January 31, 2001, were prospectively enrolled in the study if they met the following criteria: (1) age between 18 and 55 yr; (2) expected Injury Severity Score (ISS)<sup>13</sup> greater than 16; and (3) probability of survival greater than 48 h. Patients were not eligible if they had previous acute or chronic disease or treatment, especially those that may have disrupted the HPA axis. Pregnancy was also an exclusion criteria.

The protocol was approved by the Comité Consultatif de Protection des Personnes dans la Recherche Biomédicale (No 00/1829), and informed consent was obtained

This article is featured in "This Month in Anesthesiology." Please see this issue of ANESTHESIOLOGY, page 5A.

\* Resident, † Fellow, § Assistant Professor, || Professor and Chairman, Service d'Anesthésie-Réanimation et Unité Propre de Recherche de l'Enseignement Supérieur-Equipe d'Accueil (UPRES-EA 392), ‡ Biological Scientist, Service de Biochimie Hormonale.

Received from the Service d'Anesthésie-Réanimation et Unité Propre de Recherche de l'Enseignement Supérieur-Equipe d'Accueil (UPRES-EA 392) and Service de Biochimie Hormonale, Hôpital de Bicêtre, Le Kremlin Bicêtre, France. Submitted for publication November 2, 2001. Accepted for publication May 15, 2002. Supported by the Association Mises-Au-Point en Anesthésie-Réanimation pour le développement de l'Enseignement et de la Recherche en Anesthésie-Réanimation, Le Kremlin Bicêtre, France.

Address reprint requests to Dr. Edouard: Service d'Anesthésie-Réanimation, Hôpital de Bicêtre, 94275 Le Kremlin Bicêtre, France. Address electronic mail to: alain.edouard@bct.ap-hop-paris.fr. Individual article reprints may be purchased through the Journal Web site, www.anesthesiology.org.

from the patient's next of kin. The care of the patients was directed by the same existing protocols and was not modified by the study. Volume loading was performed to obtain a mean arterial pressure 70 mmHg or greater, a hemoglobin concentration 8 g/dl or greater, a prothrombin time 16 s or greater, and a platelet count  $75 \times 10^9/l$  or greater. Norepinephrine was given when the volume status was considered as normal in the face of persistent hypotension or to maintain a cerebral perfusion pressure of 70 mmHg or greater.

#### Data Collection

**Clinical Evaluation.** Two periods were defined during the evolution of the patients: the early phase and the late phase. The early phase, from the trauma to the end of the resuscitative period, included the surgical procedures. At that time, hemodynamic stability of the patients was assessed by the absence of additional volume loading or increase in norepinephrine dosage during the last 12 h. The late phase corresponded to the end of the first posttraumatic week.<sup>2</sup> The ISS and Simplified Acute Physiology Score<sup>14</sup> were calculated during the early phase to assess the magnitude of the trauma and its general consequences. An Abbreviated Injury Scale for the Head of 3 or greater defined a severe brain injury.<sup>13</sup> A Shock Score of 3 or greater defined a significant hemorrhagic shock during the early phase.<sup>15</sup> A Multiple Organ Dysfunction score was calculated each day.<sup>16</sup> The Multiple Organ Dysfunction scores at the end of the early phase and during the late phase were reported. The total amount of fluids infused during the early phase was noted, and the rate of volume loading was calculated by dividing the total amount by the duration of the phase. The duration of norepinephrine infusion and the total amount of the drug infused were calculated. Each patient was examined daily for the presence of nosocomial infections (urinary tract, bloodstream, wound infection) according to the criteria established by the Centers for Disease Control.<sup>17</sup> A pulmonary infection was considered nosocomial if it manifested more than 48 h after hospital admission. Ventilator-associated pneumonia was defined as a pneumonia occurring after more than 48 h of mechanical ventilation. Pneumonia was suspected on the appearance of persistent pulmonary infiltrates on the chest radiograph and at least one of the following clinical and biologic findings: (1) purulent tracheal secretions; (2) body temperature greater than 38.5°C or less than 36.5°C; and (3) leukocyte count greater than  $10 \times 10^9/l$  or less than  $4 \times 10^9/l$ .<sup>18</sup> Confirmation of pneumonia was obtained by a positive plugged telescoping catheter ( $\leq 10^3$  cfu/ml).<sup>19</sup> The diagnosis of pneumonia was also accepted in the presence of a microorganism in pleural effusion or isolation of the same microorganism (except coagulase-negative staphylococci or *Corynebacterium* spp.) from at least one blood culture as well as a respiratory tract specimen, in the absence of other foci

of infection.<sup>20</sup> For each patient, the number of infectious episodes was noted. All patients were evaluated for the complete ICU stay, and outcome and length of stay in the ICU and hospital were reported.

**Laboratory Variables.** Plasma lactate and total plasma proteins were measured using routine assays. Lactate was used as a biologic marker of ischemia, and plasma proteins were used as an index of dilution.

A short corticotropin stimulation test was performed at the end of the early phase and during the late phase.<sup>3</sup> Tetracosactrin, 250  $\mu$ g (Synacthène®; Ciba, Rueil-Malmaison, France) was given intravenously. Blood samples were taken immediately before the test and 30 and 60 min afterward. After centrifugation, plasma samples were stored at  $-20^\circ\text{C}$ , and cortisol was measured by radioimmunoassay (CORT-CT2; Schering, Gif-sur-Yvette, France) with a detection limit at 0.2  $\mu$ g/10 ml. Assuming that, in trauma patients as in septic patients, basal cortisol concentrations would be greater than 18  $\mu$ g/dl, the cortisol response to corticotropin stimulation was defined as the difference between the basal concentration and the highest of the 30- and 60-min concentrations and not as the peak cortisol value after corticotropin. In these conditions, the diagnosis of impaired adrenal function reserve was established on the basis of a cortisol response less than 9  $\mu$ g/dl, and the patient became a so-called nonresponder to the corticotropin stimulation.<sup>3</sup>

At the end of the early phase, the plasma sampled before the corticotropin stimulation was used to assay the plasma concentration of interleukin-6. Measurements were performed in duplicate using a solid-phase sandwich enzyme-linked immunosorbent assay (Immunotech®, Beckman Coulter, Marseille, France). For interleukin-6, the samples were incubated in microtiter plate wells, coated with a first monoclonal antibody in the presence of a second monoclonal linked to acetylcholinesterase. The assay detection limit was 3 pg/ml.

#### Statistical Analysis

Assuming that the incidence of abnormal cortisol response to corticotropin stimulation may be of the same magnitude for severely injured patients as for patients with septic shock (between 40 and 50%),<sup>4</sup> a sample size of at least 25 trauma patients was calculated to achieve a  $\beta$  error of 0.1 and an  $\alpha$  error of 0.05 (one-sided test). Continuous variables were first checked for normality or nonnormality using a Shapiro-Wilk test. When a variable appeared log-distributed, the transformation was used for further comparison. Thereafter, variables were compared using the Fisher exact test for proportions, Mann-Whitney U test for nonnormally or nonlog-normally distributed continuous variables, and Student *t* test for normally or log-normally distributed variables. Correlations between log-cytokine concentrations in blood and changes in cortisol concentrations after the early corticotropin stimulation were performed using linear regres-

Table 1. Characteristics of the Patients and Results of the Two Corticotropin Stimulations

| No. | Sex | Age (yr) | t <sub>0</sub> | ISS | SAPS | Shock | t <sub>1</sub> | Cort <sub>1</sub> | ΔCort <sub>1</sub> | t <sub>2</sub> | Cort <sub>2</sub> | ΔCort <sub>2</sub> | S/NS |
|-----|-----|----------|----------------|-----|------|-------|----------------|-------------------|--------------------|----------------|-------------------|--------------------|------|
| 1   | M   | 18       | 5.5            | 34  | 23   | No    | 12.0           | 17.0              | +8.2               | 127.5          | 14.3              | +20.8              | S    |
| 2   | M   | 19       | 2.0            | 29  | 20   | Yes   | 12.0           | 11.0              | +3.0               | 130.0          | 22.6              | +18.0              | S    |
| 3   | F   | 20       | 4.0            | 27  | 32   | Yes   | 55.0           | 9.0               | +7.0               | 170.5          | 19.4              | +16.7              | S    |
| 4   | F   | 45       | 1.0            | 22  | 28   | No    | 39.0           | 9.0               | +12.2              | 180.0          | 24.3              | +14.6              | S    |
| 5   | M   | 42       | 4.0            | 29  | 42   | Yes   | 24.0           | 42.6              | +2.5               | 166.0          | 5.8               | +19.4              | S    |
| 6   | M   | 48       | 1.0            | 24  | 41   | Yes   | 63.0           | 21.2              | +15.9              | 255.0          | 22.0              | +13.3              | S    |
| 7   | M   | 29       | 2.0            | 17  | 8    | No    | 20.0           | 18.5              | +12.9              | 71.0           | 15.4              | +18.3              | S    |
| 8   | M   | 54       | 2.0            | 27  | 55   | Yes   | 38.0           | 16.2              | +8.9               | 158.0          | 13.2              | +9.6               | S    |
| 9   | M   | 25       | 2.0            | 41  | 46   | No    | 11.0           | 10.5              | +2.7               | —              | —                 | —                  | NS   |
| 10  | M   | 43       | 1.0            | 27  | 22   | No    | 6.0            | 1.6               | +25.4              | 118.0          | 19.0              | +26.0              | S    |
| 11  | M   | 41       | 2.5            | 34  | 42   | No    | 13.0           | 22.0              | +15.0              | 132.0          | 16.0              | +18.0              | S    |
| 12  | M   | 55       | 1.0            | 18  | 30   | Yes   | 6.0            | 23.9              | +3.3               | 248.0          | 26.0              | +6.8               | S    |
| 13  | F   | 23       | 10.0           | 43  | 45   | No    | 7.0            | 16.6              | +12.3              | 127.0          | 16.0              | +13.4              | S    |
| 14  | M   | 18       | 2.0            | 38  | 52   | No    | 12.0           | 28.0              | -0.1               | 185.5          | 8.6               | +24.8              | NS   |
| 15  | M   | 41       | 2.0            | 29  | 63   | Yes   | 30.0           | 16.7              | -1.8               | 148.0          | 33.6              | +7.8               | NS   |
| 16  | M   | 40       | 1.0            | 24  | 47   | Yes   | 15.0           | 16.9              | +14.0              | 135.0          | 18.0              | +15.2              | S    |
| 17  | M   | 52       | 1.0            | 17  | 36   | No    | 12.0           | 24.7              | +18.2              | 57.0           | 18.7              | +18.2              | S    |
| 18  | M   | 24       | 10.0           | 25  | 46   | No    | 20.0           | 33.7              | +18.5              | 140.0          | 12.2              | +29.1              | S    |
| 19  | M   | 18       | 3.0            | 33  | 59   | Yes   | 6.0            | 13.1              | +5.9               | —              | —                 | —                  | NS   |
| 20  | M   | 25       | 5.0            | 35  | 42   | No    | 19.0           | 23.7              | +9.2               | 131.0          | 18.2              | +12.1              | S    |
| 21  | F   | 20       | 7.0            | 29  | 26   | No    | 19.0           | 28.9              | +23.1              | 59.5           | 18.7              | +18.2              | S    |
| 22  | M   | 24       | 3.0            | 21  | 28   | No    | 10.0           | 9.7               | +2.3               | 124.0          | 24.0              | +16.7              | S    |
| 23  | F   | 18       | 9.0            | 20  | 38   | Yes   | 38.0           | 6.2               | +16.8              | 135.5          | 4.7               | +18.0              | S    |
| 24  | M   | 27       | 1.0            | 34  | 38   | Yes   | 14.0           | 8.9               | +7.7               | 127.5          | 19.3              | +8.7               | S    |
| 25  | M   | 26       | 2.0            | 25  | 21   | No    | 15.0           | 23.4              | +5.7               | 220.5          | 25.9              | +13.0              | S    |
| 26  | M   | 22       | 4.0            | 29  | 21   | No    | 18.0           | 21.4              | +9.9               | 278.5          | 18.4              | +13.8              | S    |
| 27  | M   | 31       | 2.0            | 38  | 55   | Yes   | 23.0           | 9.1               | +12.6              | 249.0          | 19.3              | +20.7              | S    |
| 28  | M   | 36       | 2.0            | 25  | 11   | No    | 14.0           | 16.2              | +9.7               | 187.0          | 15.0              | +15.0              | S    |
| 29  | F   | 50       | 7.0            | 29  | 38   | No    | 18.0           | 13.0              | +9.2               | 111.0          | 28.0              | +13.1              | S    |
| 30  | M   | 32       | 3.0            | 43  | 27   | Yes   | 15.0           | 17.3              | +8.2               | 185.0          | 22.0              | +8.0               | S    |
| 31  | F   | 43       | 2.0            | 41  | 59   | Yes   | 19.0           | 14.0              | +7.0               | 158.0          | 31.0              | +21.0              | S    |
| 32  | M   | 32       | 1.0            | 25  | 20   | Yes   | 27.0           | 26.0              | +4.0               | 122.5          | 9.0               | +18.0              | S    |
| 33  | M   | 44       | 3.0            | 34  | 32   | Yes   | 39.0           | 24.0              | +15.0              | 152.5          | 23.0              | +19.0              | S    |
| 34  | F   | 55       | 7.0            | 25  | 39   | No    | 48.0           | 24.2              | +9.0               | 218.0          | 18.1              | +24.7              | NS   |

Cortisol units are  $\mu\text{g/dl}$ .

t<sub>0</sub> = time to admission; ISS = Injury Severity Score; SAPS = Simplified Acute Physiology Score; t<sub>1</sub> = time to the first or "early" stimulation (h); Cort<sub>1</sub> = basal value during the first stimulation; ΔCort<sub>1</sub> = response during the first stimulation; t<sub>2</sub> = time to the second or "late" stimulation (h); Cort<sub>2</sub> = basal value during the second stimulation; ΔCort<sub>2</sub> = response during the second stimulation; S = significant; NS = nonsignificant.

sions. Data are presented as the mean  $\pm$  SD.  $P < 0.05$  was considered as the minimum level of statistical significance.

## Results

Sixty-one patients were admitted in the surgical ICU during the study period. Twenty-two patients were not eligible because of age older than 55 yr ( $n = 7$ ), an ISS less than 16 ( $n = 4$ ), a chronic disease ( $n = 7$ ), or a recent steroid administration ( $n = 4$ ). Five eligible patients were not included because of death within 48 h ( $n = 3$ ) or technical problems with biologic analysis ( $n = 2$ ). Thirty-four patients were therefore included (age,  $34 \pm 12$  yr; male/female ratio, 26/8; table 1). They were admitted in the unit  $3.4 \pm 2.7$  h after the trauma (vertical falls = 12, pedestrians = 8, motor vehicle accident = 14). Severity of injury was moderate or severe (ISS =  $29.1 \pm 7.3$ ) with significant physiologic consequences (Simplified Acute Physiology Score =  $21.7 \pm 14.3$ ).

The first corticotropin stimulation (early phase) was performed  $21.7 \pm 14.3$  h after the trauma in the whole group (table 1). Nineteen patients (56%) had a basal cortisol plasma concentration less than  $18 \mu\text{g/dl}$ . Sixteen patients had a cortisol response less than  $9 \mu\text{g/dl}$  and were designed as early nonresponders (table 2 and fig. 1). The cortisol responses were not correlated with the basal cortisol concentrations, which were identical between nonresponders and responders ( $17.9 \pm 9.0$  vs.  $18.4 \pm 8.2 \mu\text{g/dl}$ , respectively;  $P = 0.886$ ). As shown in table 2, early nonresponders and early responders were similar in terms of age, gender, time of admission, ISS, Simplified Acute Physiology Score, mechanical ventilation and subsequent sedation, and time to early corticotropin stimulation. Previous intravenous etomidate administration was similar in the two groups ( $0.5$ – $0.6$  mg/kg,  $25.8 \pm 12.0$  and  $23.8 \pm 12.2$  h before the stimulation in responders and nonresponders, respectively). The incidence of brain injury was not different between the two subgroups of patients (69 vs. 44%, respectively;  $P =$

**Table 2. Clinical and Biologic Characteristics of the Patients according to the Cortisol Response ( $\Delta$ Cort) to Corticotropin Stimulation at the End of the Early Phase**

|                               | Early Responder<br>$\Delta$ Cort $\geq 9$ $\mu$ g/dl | Early Nonresponder<br>$\Delta$ Cort $< 9$ $\mu$ g/dl | P Value |
|-------------------------------|------------------------------------------------------|------------------------------------------------------|---------|
| Time to early stimulation (h) | 23.9 $\pm$ 15.3                                      | 19.1 $\pm$ 13.0                                      | 0.333   |
| n                             | 18                                                   | 16                                                   |         |
| Age (yr)                      | 35.9 $\pm$ 12.1                                      | 30.9 $\pm$ 12.6                                      | 0.244   |
| Gender (M/F)                  | 12/6                                                 | 14/2                                                 | 0.233   |
| Time to admission (h)         | 2.5 $\pm$ 1.2                                        | 4.2 $\pm$ 3.3                                        | 0.057   |
| Injury Severity Score         | 27.6 $\pm$ 7.1                                       | 30.9 $\pm$ 7.3                                       | 0.195   |
| SAPS II                       | 34.3 $\pm$ 12.7                                      | 39.4 $\pm$ 15.4                                      | 0.436   |
| Etomidate administration      | 12                                                   | 9                                                    | 0.725   |
| Hemorrhagic shock             | 5                                                    | 11                                                   | 0.037   |
| Peak arterial lactate         | 2.2 $\pm$ 1.5                                        | 3.9 $\pm$ 1.7                                        | 0.003   |
| Early MOD score               | 4.6 $\pm$ 2.7                                        | 7.6 $\pm$ 2.9                                        | 0.004   |
| Total volume loading (ml)     | 8,011 $\pm$ 6,412                                    | 10,297 $\pm$ 7,600                                   | 0.349   |
| Volume loading rate (ml/h)    | 409 $\pm$ 434                                        | 583 $\pm$ 344                                        | 0.022   |
| Crystalloid volume (ml)       | 4,489 $\pm$ 3,194                                    | 4,066 $\pm$ 3,067                                    | 0.697   |
| Colloid volume (ml)           | 1,975 $\pm$ 2,062                                    | 3,356 $\pm$ 1,724                                    | 0.043   |
| No. of patients transfused    | 9                                                    | 11                                                   | 0.315   |
| Blood product volume (ml)     | 1,547 $\pm$ 2,174                                    | 2,813 $\pm$ 3,297                                    | 0.191   |
| Norepinephrine infusion       | 11                                                   | 12                                                   | 0.324   |
| Mechanical ventilation        | 11                                                   | 13                                                   | 0.270   |
| Plasma total proteins (g/l)   | 46.6 $\pm$ 11.5                                      | 44.1 $\pm$ 9.2                                       | 0.484   |
| Interleukin-6 (pg/ml)         | 311 $\pm$ 466                                        | 728 $\pm$ 589                                        | 0.048   |

MOD = multiple organ dysfunction.

0.185) and the mean Abbreviated Injury Scale for the Head were similar ( $2.9 \pm 1.8$  vs.  $2.4 \pm 2.2$ , respectively;  $P = 0.394$ ). Nonresponders and responders were significantly different in terms of incidence of hemorrhagic shock (69 vs. 28%, respectively;  $P = 0.037$ ), early Multiple Organ Dysfunction score ( $7.6 \pm 2.9$  vs.  $4.6 \pm 2.7$ , respectively;  $P = 0.004$ ), and peak arterial lactate ( $3.9 \pm 1.7$  vs.  $2.2 \pm 1.5$ , respectively;  $P = 0.003$ ). The rate of volume loading and the volume of infused colloid solution (hydroxyethylstarch) were also significantly higher in the nonresponder group. However, neither the magnitude of the dilution nor the incidence of norepinephrine infusion was different between the two groups. Finally, the interleukin-6 concentrations were significantly higher in nonresponders.

The second corticotropin stimulation (late phase) was performed at a similar time in early nonresponders and early responders (table 3). Two patients died in the early nonresponders group before this second test. The four nonresponders at the second stimulation came exclusively from the early nonresponders group ( $P = 0.028$ ; fig. 1). As shown in table 3, total number of infectious episodes, mortality, and lengths of stay were similar between early nonresponders and early responders. The main differences between these two subgroups of patients during the ICU stay were the duration of vasopressor therapy and the total amount of norepinephrine infused. Whatever the responses, patients were not given exogenous steroids throughout the study.

Figure 2 shows the relation between the hemorrhagic shock and the cortisol response to corticotropin stimu-

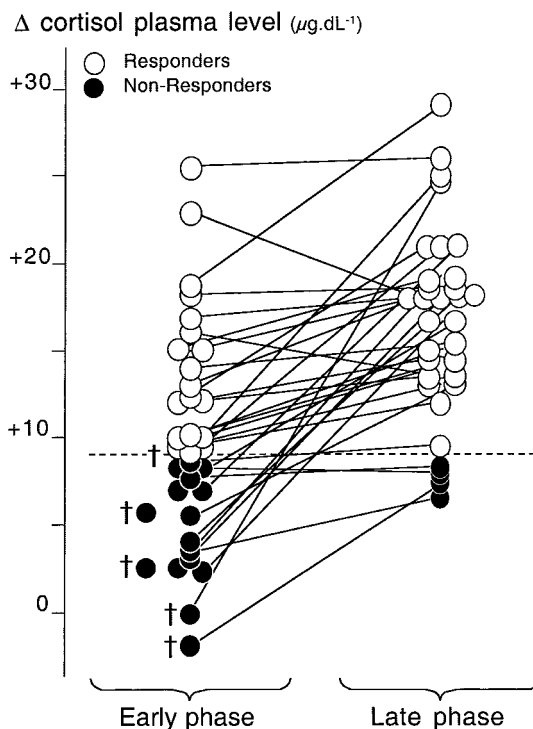

**Fig. 1. Cortisol response to corticotropin stimulation at the end of the early phase ( $21.7 \pm 14.3$  h) and at the end of the first posttraumatic week (late phase;  $156.5 \pm 52.2$  h). The dashed line represents the threshold of normal response ( $+9$  g/dl), and daggers indicate the nonsurvivors.**

lation. Despite similar mean basal cortisol concentrations before the two corticotropin stimulations between patients without or with shock, there was a trend toward a lesser response in shock patients, and the incidence of nonresponders was higher in this subgroup as compared with the patients without shock (69 vs. 28%, respectively;  $P = 0.037$ ). As shown in figure 2, the cortisol response to corticotropin stimulation increased between the two periods of the study in the two sub-

**Table 3. Influence of the Cortisol Response ( $\Delta$ Cort) to Corticotropin Stimulation during the Early Phase on the Response to the Second Stimulation (Late Phase) and the Overall Outcomes**

|                                       | Early Responder<br>$\Delta$ Cort $\geq 9$ $\mu$ g/dl | Early Nonresponder<br>$\Delta$ Cort $< 9$ $\mu$ g/dl | P value |
|---------------------------------------|------------------------------------------------------|------------------------------------------------------|---------|
| Time to late stimulation (h)          | 152.1 $\pm$ 64.0                                     | 162.2 $\pm$ 37.9                                     | 0.607   |
| Late MOD score                        | 2.6 $\pm$ 2.5                                        | 3.4 $\pm$ 3.9                                        | 0.518   |
| Plasma total proteins (g/l)           | 54.5 $\pm$ 5.5                                       | 52.9 $\pm$ 7.1                                       | 0.466   |
| Basal cortisol value ( $\mu$ g/dl)    | 18.1 $\pm$ 5.0                                       | 19.6 $\pm$ 8.5                                       | 0.518   |
| $\Delta$ Cortisol value ( $\mu$ g/dl) | +17.8 $\pm$ 4.8                                      | +14.9 $\pm$ 5.9                                      | 0.138   |
| No. of infectious episodes            | 1.9 $\pm$ 2.5                                        | 2.3 $\pm$ 2.6                                        | 0.660   |
| Norepinephrine treatment              |                                                      |                                                      |         |
| Duration (h)                          | 51.3 $\pm$ 112.0                                     | 84.6 $\pm$ 103.1                                     | 0.040   |
| Total dose (mg)                       | 30.0 $\pm$ 62.1                                      | 123.2 $\pm$ 245.2                                    | 0.038   |
| ICU length of stay (days)             | 15.8 $\pm$ 11.7                                      | 18.0 $\pm$ 16.4                                      | 0.650   |
| ICU death (mortality)                 | 1 (6%)                                               | 4 (25%)                                              | 0.164   |
| Hospital length of stay (days)        | 50.2 $\pm$ 44.0                                      | 47.7 $\pm$ 54.3                                      | 0.584   |

MOD = multiple organ dysfunction; ICU = intensive care unit.



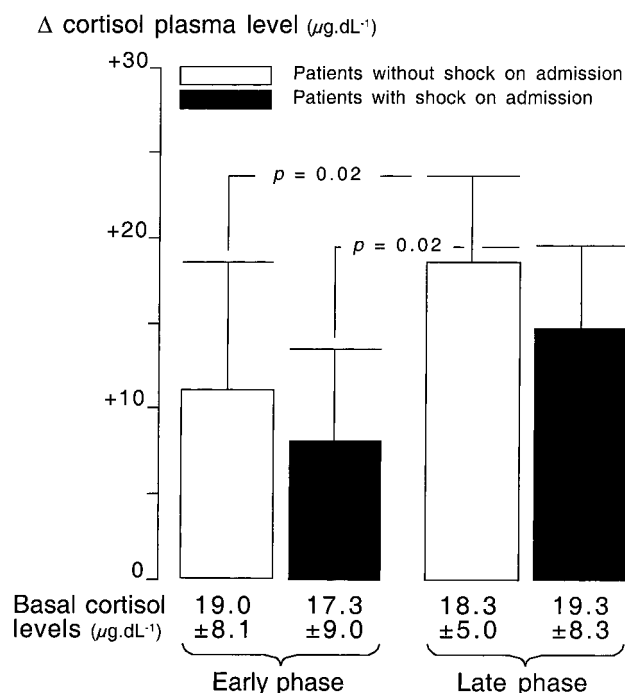

Fig. 2. Influence of hemorrhagic shock on the basal cortisol plasma concentrations and the cortisol response to corticotropin stimulation at the end of the early phase and at the end of the first posttraumatic week (late phase).

groups, but four shock patients remained nonresponders at the second stimulation (29 vs. 0%;  $P = 0.038$ ).

At the end of the early phase, before the first corticotropin stimulation, the interleukin-6 plasma concentrations were higher in shock patients than in the remaining patients ( $661 \pm 549$  vs.  $383 \pm 498$  pg/ml, respectively;  $P = 0.05$ ). As shown in figure 3, cortisol response after the early corticotropin stimulation was negatively correlated with concomitant interleukin-6 plasma concentrations.

## Discussion

In the current study, a significant decrease in adrenal reserve was observed in 47% of trauma patients (ISS > 16) and was prolonged during at least 7 days in 25% of these nonresponders. This abnormal cortisol response to corticotropin stimulation was related with the inflammatory consequences of hemorrhagic shock and was followed by a prolonged vasopressor dependency.

Notwithstanding the fact that the short corticotropin stimulation test using 250 μg tetracosactin is widely used in ICU patients,<sup>4,11</sup> especially when basal cortisol concentrations are rather low,<sup>21</sup> its results were discussed because this supraphysiologic amount of exogenous corticotropin bypasses the brain-hypothalamus-pituitary portion of the HPA axis and tests directly the integrity of adrenal gland with a lower sensitivity than a low tetracosactin dose (1–2 μg).<sup>21</sup> Moreover, the results

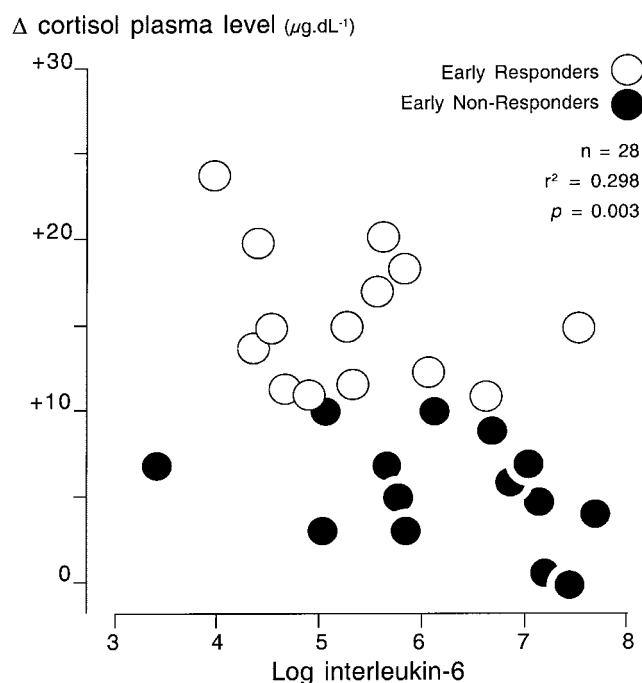

Fig. 3. Relation between interleukin-6 plasma concentrations and the cortisol response to corticotropin stimulation at the end of the early phase. Interleukin-6 plasma concentrations were not available in six patients.

of the test were established in healthy subjects and in patients with absolute adrenal insufficiency and not in critically ill patients,<sup>22</sup> even if the prognostic value of the combination of basal cortisol concentrations with cortisol response was recently demonstrated in septic shock patients.<sup>4</sup> Nevertheless, we qualified our results as an impaired adrenal reserve and attributed such an abnormal response to hemorrhagic shock after consideration of the possible alternative role of anesthesia, volume loading, and brain injury. Indeed, etomidate reduces the adrenal reserve through an inhibition of steroidogenesis<sup>23</sup> in 88% of patients receiving a single dose of the drug.<sup>24</sup> However, this adrenocortical dysfunction appears to resolve within 12 h of a single bolus dose,<sup>25</sup> and this anesthetic was equally distributed between early nonresponders and responders in the current study. In the same way, plasma dilution following volume loading was similar in the two subgroups of patients and could only be involved in the high incidence of low cortisol concentrations in these patients, as previously suggested by Rydval et al.<sup>26</sup> However, because a stable plasma osmolality was a standard of care for the trauma patients,<sup>27</sup> and a deleterious effect of hydroxyethyl starch on adrenal reactivity seems unlikely, a direct role of volume loading in the impairment of the cortisol response to corticotropin stimulation was not taken into account. Finally, isolated brain injury induces a biphasic pattern of neuroendocrine activity with an early sympathetic storm and an altered function of HPA axis, followed by a decrease in both responses<sup>28</sup> in such a way

that an hypopituitarism occurs in approximately 40% of the patients with moderate or severe head injury.<sup>29</sup> Even if more than one half of the multiple-injured patients suffered from a severe brain injury in the current study, the exclusive role of the head trauma in the reported decrease in adrenal reserve was excluded because the incidence and magnitude of brain injuries were similar between early nonresponders and responders, and because the HPA dysfunction is mainly observed in brain-injured patients with hypotensive or hypoxic insults.<sup>29</sup>

Hemorrhagic shock is the main factor of the posttraumatic inflammatory response, and the immunologic consequences of trauma are correlated with the severity of hemodynamic insult.<sup>30</sup> Experimental repeated or prolonged hemorrhage induces a delayed cortisol secretion,<sup>31</sup> and the basal cortisol concentrations are inversely correlated with the increase in interleukin-6 concentrations following experimental hemorrhage-reinfusion.<sup>32</sup> The association of hemorrhage-reperfusion with tissue injuries explains the magnitude of interleukin-6 expression following trauma.<sup>8,9,33</sup> In humans, exogenous interleukin-6 causes an impressive marked and prolonged elevation of plasma corticotropin and cortisol on the first day, followed by blunted corticotropin responses.<sup>10</sup> A continuous and sustained corticotropin secretion may therefore occur in trauma patients and might lead to a pituitary depletion over a period of time. Following experimental hemorrhage and resuscitation, a decrease in hepatic 11 $\beta$ -hydroxysteroid dehydrogenase activity leads to a sustained increase in plasma corticosterone concentrations, which regulate the corticotropin release, further reducing adrenal responsiveness.<sup>34</sup> A primary failure of pituitary function was observed in septic shock patients,<sup>22,35</sup> and the abnormal cortisol response to corticotropin stimulation has been attributed to a prolonged understimulated adrenal gland.<sup>22</sup>

The early adrenal dysfunction was clearly associated with an increased need for vasopressor therapy. Such a relation may be explained by a reduction of the well-known role of steroids in the regulation of adrenergic receptor numbers and responses.<sup>3</sup> The current results suggest an impaired pressor sensitivity to catecholamines in trauma patients, which has been demonstrated in animals<sup>36</sup> and warrants further clinical studies.

In conclusion, this study confirms the fact that a sustained inflammatory response from either infective or noninfective source results in cortisol deficiency in relation with a primary adrenal insufficiency or a loss of corticotropin secretion. A clinical exploration of HPA axis, using a measurement of corticotropin and cortisol concentrations before and after a stimulation by corticotropin or corticotropin-releasing hormone, may be indicated in trauma patients to identify the consequences of a possible modulation of HPA axis activity.

## References

- Bornstein SR, Chrousos GP: Clinical review 104: Adrenocorticotropin (ACTH)- and non-ACTH-mediated regulation of the adrenal cortex: Neural and immune inputs. *J Clin Endocrinol Metab* 1999; 84:1729-36
- Moore FA, Moore EE: Evolving concepts in the pathogenesis of postinjury multiple organ failure. *Surg Clin North Am* 1995; 75:257-77
- Anname D, Bellissant E, Sebille V, Lesieur O, Mathieu B, Raphael JC, Gajdos P: Impaired pressor sensitivity to noradrenaline in septic shock patients with and without impaired adrenal function reserve. *Br J Clin Pharmacol* 1998; 46:589-97
- Anname D, Sebille V, Troche G, Raphael JC, Gajdos P, Bellissant E: A 3-level prognostic classification in septic shock based on cortisol levels and cortisol response to corticotropin. *JAMA* 2000; 283:1038-45
- Claussen MS, Landercasper J, Cogbill TH: Acute adrenal insufficiency presenting as shock after trauma and surgery: Three cases and review of the literature. *J Trauma* 1992; 32:94-100
- Barquist E, Kirton O: Adrenal insufficiency in the surgical intensive care unit patient. *J Trauma* 1997; 42:27-31
- Nieboer P, van der Werf TS, Beentjes JA, Tulleken JE, Zijlstra JG, Ligtenberg JJ: Catecholamine dependency in a polytrauma patient: Relative adrenal insufficiency? *Intensive Care Med* 2000; 26:125-7
- Hoch RC, Rodriguez R, Manning T, Bishop M, Mead P, Shoemaker WC, Abraham E: Effects of accidental trauma on cytokine and endotoxin production. *Crit Care Med* 1993; 21:839-45
- Roumen RM, Hendriks T, van der Ven-Jongekrijg J, Nieuwenhuijzen GA, Sauerwein RW, van der Meer JW, Goris RJ: Cytokine patterns in patients after major vascular surgery, hemorrhagic shock, and severe blunt trauma: Relation with subsequent adult respiratory distress syndrome and multiple organ failure. *Ann Surg* 1993; 218:769-76
- Mastorakos G, Chrousos GP, Weber JS: Recombinant interleukin-6 activates the hypothalamic-pituitary-adrenal axis in humans. *J Clin Endocrinol Metab* 1993; 77:1690-4
- Soni A, Pepper GM, Wyrwinski PM, Ramirez NE, Simon R, Pina T, Gruen-span H, Vaca CE: Adrenal insufficiency occurring during septic shock: Incidence, outcome, and relationship to peripheral cytokine levels. *Am J Med* 1995; 98:266-71
- Lenczowski MJ, Schmidt ED, Van Dam AM, Gaykema RP, Tilders FJ: Individual variation in hypothalamus-pituitary-adrenal responsiveness of rats to endotoxin and interleukin-1 beta. *Ann N Y Acad Sci* 1998; 856:139-47
- Civil ID, Schwab CW: The Abbreviated Injury Scale, 1985 revision: A condensed chart for clinical use. *J Trauma* 1988; 28:87-90
- Le Gall JR, Lemeshow S, Saulnier F: A new Simplified Acute Physiology Score (SAPS II) based on a European/North American multicenter study. *JAMA* 1993; 270:2957-63
- Roumen RM, Hendriks T, Wevers RA, Goris JA: Intestinal permeability after severe trauma and hemorrhagic shock is increased without relation to septic complications. *Arch Surg* 1993; 128:453-7
- Marshall JC, Cook DJ, Christou NV, Bernard GR, Sprung CL, Sibbald WJ: Multiple organ dysfunction score: A reliable descriptor of a complex clinical outcome. *Crit Care Med* 1995; 23:1638-52
- Garner JS, Jarvis WR, Emori TG, Horan TC, Hughes JM: CDC definitions for nosocomial infections, 1988. *Am J Infect Control* 1988; 16:128-40
- Johanson WG Jr, Pierce AK, Sanford JP, Thomas GD: Nosocomial respiratory infections with gram-negative bacilli: The significance of colonization of the respiratory tract. *Ann Intern Med* 1972; 77:701-6
- Pham LH, Brun-Buisson C, Legrand P, Rauss A, Verra F, Brochard L, Lemaire F: Diagnosis of nosocomial pneumonia in mechanically ventilated patients: Comparison of a plugged telescoping catheter with the protected specimen brush. *Am Rev Respir Dis* 1991; 143:1055-61
- Meduri GU, Johanson WG Jr: International Consensus Conference: Clinical investigation of ventilator-associated pneumonia. Introduction. *Chest* 1992; 102:515S-25S
- Zaloga GP, Marik P: Hypothalamic-pituitary-adrenal insufficiency. *Crit Care Clin* 2001; 17:25-41
- Ihle BU: Adrenocortical response and cortisone replacement in systemic inflammatory response syndrome. *Anaesth Intensive Care* 2001; 29:155-62
- Fragen RJ, Weiss HW, Molteni A: The effect of propofol on adrenocortical steroidogenesis: A comparative study with etomidate and thiopental. *ANESTHESIOLOGY* 1987; 66:839-42
- Absalom A, Pledger D, Kong A: Adrenocortical function in critically ill patients 24 h after a single dose of etomidate. *Anaesthesia* 1999; 54:861-7
- Schenarts CL, Burton JH, Riker RR: Adrenocortical dysfunction following etomidate induction in emergency department patients. *Acad Emerg Med* 2001; 8:1-7
- Rydvall A, Brandstrom AK, Banga R, Asplund K, Backlund U, Stegmayr BG: Plasma cortisol is often decreased in patients treated in an intensive care unit. *Intensive Care Med* 2000; 26:545-51
- Dadoun F, Velut JG, Guillaume V, Sauze N, Orsoni JC, Gaillard RC, Oliver CC: Combined hypovolemia and hyposmolality alter hypothalamic-pituitary-adrenal axis response to endotoxin stimulation. *Neuroendocrinology* 1999; 69:352-9
- Chiolero R, Berger M: Endocrine response to brain injury. *New Horiz* 1994; 2:432-42

29. Kelly DF, Gonzalo IT, Cohan P, Berman N, Swerdloff R, Wang C: Hypopituitarism following traumatic brain injury and aneurysmal subarachnoid hemorrhage: A preliminary report. *J Neurosurg* 2000; 93:743-52
30. Schmand JF, Ayala A, Chaudry IH: Effects of trauma, duration of hypotension, and resuscitation regimen on cellular immunity after hemorrhagic shock. *Crit Care Med* 1994; 22:1076-83
31. Thrivikraman KV, Plotsky PM: Absence of glucocorticoid negative feedback to moderate hemorrhage in conscious rats. *Am J Physiol* 1993; 264:E497-503
32. Arimura A, Takaki A, Komaki G: Interactions between cytokines and the hypothalamic-pituitary-adrenal axis during stress. *Ann N Y Acad Sci* 1994; 739: 270-81
33. Ayala A, Wang P, Ba ZF, Perrin MM, Ertel W, Chaudry IH: Differential alterations in plasma IL-6 and TNF levels after trauma and hemorrhage. *Am J Physiol* 1991; 260:R167-71
34. Wang P, Ba ZF, Jarrar D, Cioffi WG, Bland KI, Chaudry IH: Mechanism of adrenal insufficiency following trauma and severe hemorrhage: Role of hepatic 11 $\beta$ -hydroxysteroid dehydrogenase. *Arch Surg* 1999; 134:394-401
35. Schroeder S, Wichers M, Klingmuller D, Hofer M, Lehmann LE, von Spiegel T, Hering R, Putensen C, Hoeft A, Stuber F: The hypothalamic-pituitary-adrenal axis of patients with severe sepsis: Altered response to corticotropin-releasing hormone. *Crit Care Med* 2001; 29:310-6
36. Wang P, Ba ZF, Stepp KJ, Chaudry IH: Pentoxifylline attenuates the depressed endothelial cell function and vascular muscle contractility following trauma and hemorrhagic shock. *J Trauma* 1995; 39:121-6
